# Supplementary material for: Genomic and Pathologic Characterization of the First FAdV-C Serotype 4 Isolate from Black-Necked Crane
Source: MDPI journal article supplement (doi:10.3390/v15081653), 2023-07-29
Supplement: s1 [file s1]

Supplementary Table S1. The detailed information of the sequences of *DNA polymerase* and *Hexon* gene retrieved from GenBank Database used for phylogenetic analysis in this study.

| <b>Virus strains</b>  | <b>Accession number</b> | <b>Species</b>                | <b>Serotype</b> |
|-----------------------|-------------------------|-------------------------------|-----------------|
| W-15                  | KX247011                | <i>Fowl aviadenovirus A</i>   | 1               |
| 61/11z                | KX247012                | <i>Fowl aviadenovirus A</i>   | 1               |
| CELO                  | U46933                  | <i>Fowl aviadenovirus A</i>   | 1               |
| WHRS                  | OM836676                | <i>Fowl aviadenovirus B</i>   | 5               |
| 340                   | KC493646                | <i>Fowl aviadenovirus B</i>   | 5               |
| 18/6239               | OK283053                | <i>Fowl aviadenovirus B</i>   | 5               |
| 19/7209               | OK283055                | <i>Fowl aviadenovirus B</i>   | 5               |
| ON1                   | GU188428                | <i>Fowl aviadenovirus C</i>   | 4               |
| MX-SHP95              | KP295475                | <i>Fowl aviadenovirus C</i>   | 4               |
| KR5                   | HE608152                | <i>Fowl aviadenovirus C</i>   | 4               |
| HLJDA15               | KX538980                | <i>Fowl aviadenovirus C</i>   | 4               |
| HB1510                | KU587519                | <i>Fowl aviadenovirus C</i>   | 4               |
| SDLC202011            | OP535470                | <i>Fowl aviadenovirus C</i>   | 4               |
| JSJ13                 | KM096544                | <i>Fowl aviadenovirus C</i>   | 4               |
| SD1511                | MF496037                | <i>Fowl aviadenovirus C</i>   | 4               |
| CH/GDYF/201706        | MK387062                | <i>Fowl aviadenovirus C</i>   | 4               |
| CH/AHMG/2018          | MN606303                | <i>Fowl aviadenovirus C</i>   | 4               |
| Kr-Yeaju              | HQ709228                | <i>Fowl aviadenovirus C</i>   | 4               |
| C2-B-FAdV-10          | MK572851                | <i>Fowl aviadenovirus C</i>   | 10              |
| 10                    | U26221                  | <i>Fowl aviadenovirus C</i>   | 10              |
| AH FY19               | MN542422                | <i>Fowl aviadenovirus C</i>   | 10              |
| 685                   | KT862805                | <i>Fowl aviadenovirus D</i>   | 2               |
| SR48                  | KT8h62806               | <i>Fowl aviadenovirus D</i>   | 2               |
| SR49                  | KT862807                | <i>Fowl aviadenovirus D</i>   | 3               |
| A-2A                  | AF083975                | <i>Fowl aviadenovirus D</i>   | 9               |
| 380                   | KT862812                | <i>Fowl aviadenovirus D</i>   | 11              |
| HBQ12                 | KM096545                | <i>Fowl aviadenovirus D</i>   | 11              |
| ON NP2                | KP231537                | <i>Fowl aviadenovirus D</i>   | 11              |
| CR119                 | KT862808                | <i>Fowl aviadenovirus E</i>   | 6               |
| YR36                  | KT862809                | <i>Fowl aviadenovirus E</i>   | 7               |
| X11-A                 | MK572855                | <i>Fowl aviadenovirus E</i>   | 7               |
| T8-A                  | MK572854                | <i>Fowl aviadenovirus E</i>   | 8a              |
| TR59                  | KT862810                | <i>Fowl aviadenovirus E</i>   | 8a              |
| 764                   | KT862811                | <i>Fowl aviadenovirus E</i>   | 8b              |
| UPM04217              | KU517714                | <i>Fowl aviadenovirus E</i>   | 8b              |
| HG                    | GU734104                | <i>Fowl aviadenovirus E</i>   | 8b              |
| SD1356                | MG712775                | <i>Fowl aviadenovirus E</i>   | 8b              |
| QD2016                | MF577036                | <i>Fowl aviadenovirus E</i>   | 8b              |
| P29                   | NC_017979               | <i>Goose aviadenovirus A</i>  | 4               |
| P18-05523-6           | MW286325                | <i>Pigeon aviadenovirus A</i> | 1               |
| YPDS-Y-V1.A19.11-2013 | NC_031503               | <i>Pigeon aviadenovirus B</i> | 2               |

| <b>Virus strains</b> | <b>Accession number</b> | <b>Species</b>                    | <b>Serotype</b> |
|----------------------|-------------------------|-----------------------------------|-----------------|
| CS15-4016            | NC_039032               | <i>Psittacine aviadenovirus B</i> | 4               |
| 18VIR149_ITA_2018    | NC_075452               | <i>Psittacine aviadenovirus C</i> | 1               |
| D90/2                | NC_014564               | <i>Turkey aviadenovirus B</i>     | 1               |

Supplementary Table S2. Orientations, locations and amino acid sizes of predicted ORFs in the BNC2021.

| <b>Name</b>  | <b>Direction<sup>1</sup></b> | <b>Location</b> | <b>Numbers of amino acid</b> |
|--------------|------------------------------|-----------------|------------------------------|
| ORF0         | R                            | 477-716         | 80                           |
| ORF1         | R                            | 789-1313        | 175                          |
| ORF1B        | R                            | 1484-1807       | 108                          |
| ORF2         | R                            | 1849-2667       | 273                          |
| ORF24        | L                            | 2669-3205       | 179                          |
| ORF14A       | L                            | 3317-3904       | 196                          |
| ORF14        | L                            | 3998-4684       | 229                          |
| ORF14B       | L                            | 4668-5297       | 210                          |
| ORF13        | L                            | 5331-6131       | 267                          |
| ORF12        | L                            | 6208-7077       | 290                          |
| IVa2         | L                            | 7091-8275       | 395                          |
| DNA pol      | L                            | 8259-12014      | 1252                         |
| pTP          | L                            | 12 019-13 827   | 603                          |
| 52/55kDa     | R                            | 13 957-15 159   | 401                          |
| pIIIa        | R                            | 15 146-16 918   | 591                          |
| Penton       | R                            | 16 990-18 567   | 526                          |
| pVII         | R                            | 18 576-18 809   | 78                           |
| pX           | R                            | 18 981-19 520   | 180                          |
| pVI          | R                            | 19 624-20 307   | 228                          |
| Hexon        | R                            | 20 353-23 166   | 938                          |
| Protease     | R                            | 23 184-23 813   | 210                          |
| DBP          | L                            | 23 934-25 415   | 494                          |
| 11.7kDa      | L                            | 25 454-25 762   | 103                          |
| 100kDa       | R                            | 25 794-28 955   | 1067                         |
| 22/33kDa     | R                            | 28 576-29 160   | 195                          |
| 9.1kDa       | L                            | 29 104-29 352   | 83                           |
| pVIII        | R                            | 29 474-30 217   | 248                          |
| U-exon       | L                            | 30 162-30 449   | 96                           |
| Fiber-1      | R                            | 30 448-31 743   | 432                          |
| Fiber-2      | R                            | 31 727-33 166   | 480                          |
| ORF22        | L                            | 33 219-33 809   | 197                          |
| ORF20A       | L                            | 33 812-34 078   | 89                           |
| ORF20        | L                            | 34 229-35 116   | 296                          |
| ORF42        | R                            | 34 955-35 368   | 138                          |
| ORF43        | R                            | 35 777-36 445   | 223                          |
| ORF28        | R                            | 36 801-37 094   | 98                           |
| ORF29        | R                            | 37 169-37 360   | 64                           |
| GAM-1        | R                            | 37 342-38 157   | 272                          |
| ORF17        | L                            | 38 773-39 249   | 159                          |
| ORF16        | L                            | 39 242-39 652   | 137                          |
| Hypothetical | L                            | 40 085-40 231   | 49                           |
| ORF19A       | R                            | 42 722-40 230   | 831                          |

| <b>Name</b> | <b>Direction<sup>1</sup></b> | <b>Location</b> | <b>Numbers of amino acid</b> |
|-------------|------------------------------|-----------------|------------------------------|
| ORF4        | R                            | 42 816-43 313   | 166                          |

<sup>1</sup> R for rightward-transcribed strand and L for leftward-transcribed strand

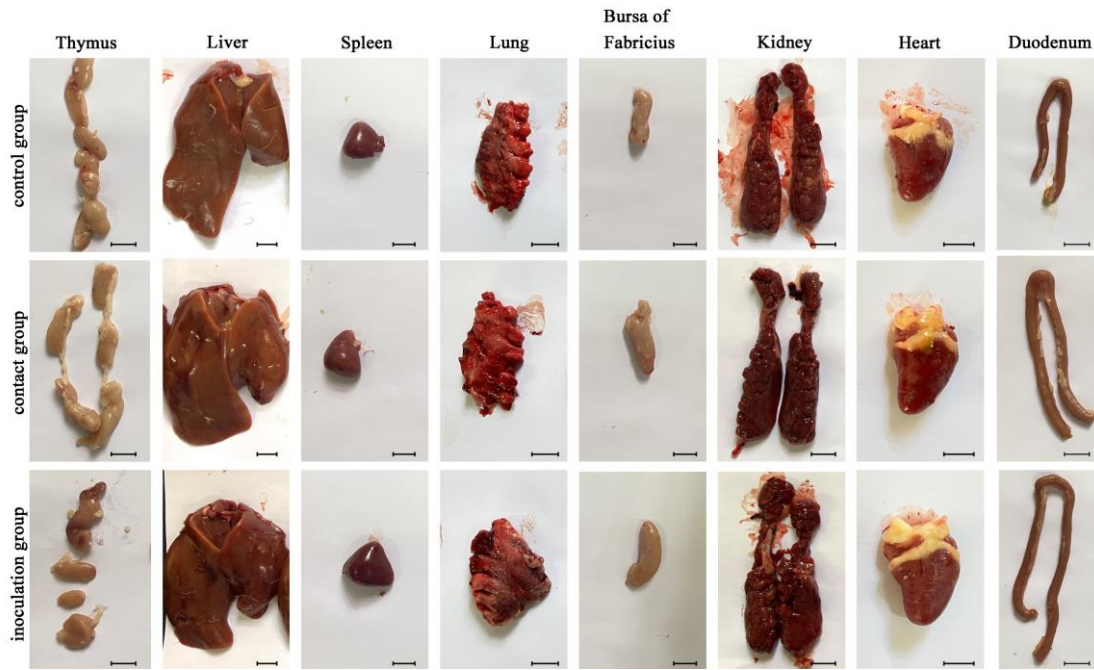

Supplementary Figure S1. Gross lesions observed in the organs of mallard ducks. The inoculation group consisted of 3-week-old mallard ducks intramuscularly inoculated with BNC2021. The contact and control groups are composed of ducks inoculated with normal DMEM cell culture medium without virus via the same route. The ducks in the inoculation and contact groups were co-housed, while the control group was housed separately. At 6 day post inoculation (dpi), hyperemia characteristics were observed in the tissues of thymus, lung, and duodenum of the inoculation and contact groups; swelling was observed in the tissues of liver, spleen, bursa of Fabricius, kidney, and heart; and softening of tissue texture was observed in the tissues of lung, liver, and kidney. Bar=1 cm.
